# Supplementary material
Source: PubMed Central journal article supplement (PMC2638060)
Supplement: NIHMS87169-supplement-01.pdf [file NIHMS87169-supplement-01.pdf]

# SUPPLEMENTAL MATERIAL

- Supplemental Figure 1. Cell types that contribute to the gene expression changes associated with imatinib therapy.
- Supplemental Table 1. Imatinib Responsive Genes.

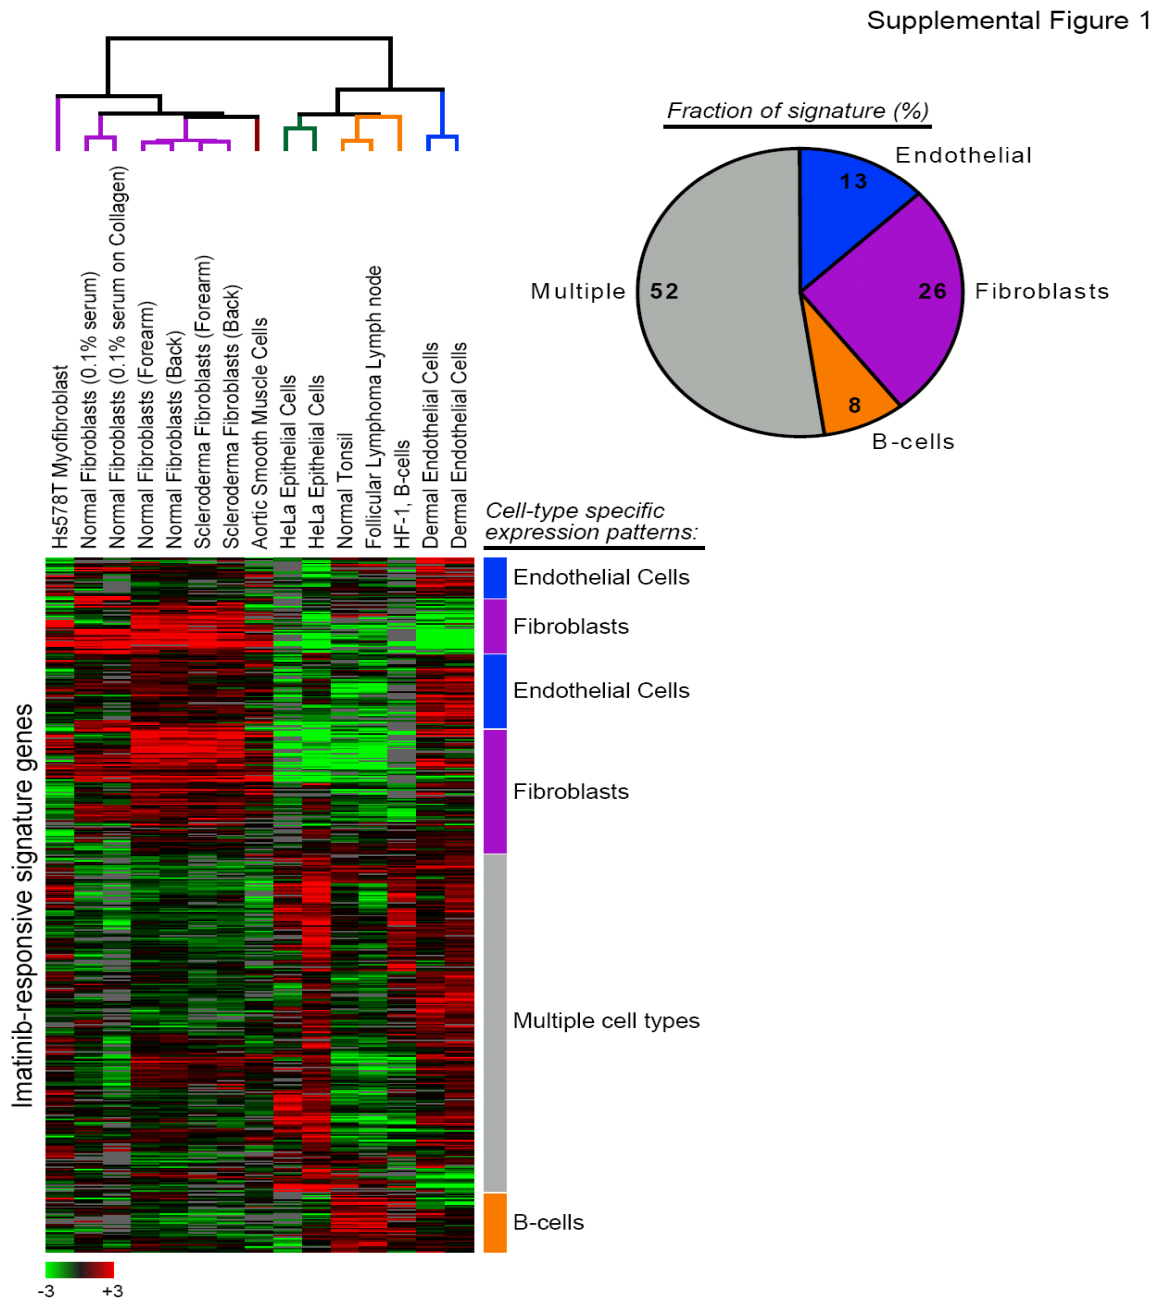

**Supplemental Figure 1.** Cell types that contribute to the gene expression changes associated with imatinib therapy. The imatinib-responsive gene expression signature was isolated from gene expression profiles of 11 individual cell types that are likely to be present in skin (Whitfield et al., *PNAS*, 2003). Using UniGene ID to convert the genes, 485 of 1050 imatinib-responsive genes were isolated. Imatinib-responsive genes that are specifically expressed in a given cell type are highlighted on the right. The percentages of the genes specifically expressed in fibroblasts, endothelial cells, B-cells, or multiple cell types are provided.
